# Supplementary material for: Integrated metabolomic and transcriptomic analyses revealed the distribution of saponins in Panax notoginseng
Source: PubMed Central journal article supplement — Acta Pharm Sin B. 2018 Feb 3;8(3):458–65. doi: 10.1016/j.apsb.2017.12.010 (PMC5989832; doi:10.1016/j.apsb.2017.12.010), 2018-02-03
Supplement: mmc1.pdf [file mmc1.pdf]

## Supplementary Information

### Integrated metabolomic and transcriptomic analyses revealed the distribution of saponins in *Panax notoginseng*

Guangfei Wei<sup>a,b,†</sup>, Linlin Dong<sup>a,†</sup>, Juan Yang<sup>a</sup>, Lianjuan Zhang<sup>a</sup>, Jiang Xu<sup>a</sup>, Feng Yang<sup>a</sup>, Ruiyang Cheng<sup>a</sup>, Ran Xu<sup>a</sup>, Shilin Chen<sup>a,\*</sup>

<sup>a</sup>Key Laboratory of Beijing for Identification and Safety Evaluation of Chinese Medicine, Institute of Chinese Materia Medica, China Academy of Chinese Medical Sciences, Beijing 100700, China

<sup>b</sup>Shandong University of Traditional Chinese Medicine, Jinan 250355, China

\*Corresponding author. Tel.: 86 10 57203877; fax: 86 10 62899776.

E-mail address: slchen@icmm.ac.cn (Shilin Chen)

These authors made equal contributions to this work.

## Results

The resulting dataset of all components between different parts were analyzed to examine the clustering of each group using multivariate statistical analysis. Five parts of two-year *P. notoginseng* showed separation; in the five parts of three-year *P. notoginseng*, principal component 1, which is the key component for sample separation, identified the underground parts (root and fibril) and the aerial parts (stem, leaf, flower); however, the flower overlapped the stem, and the root clustered with the fibril (Fig. S1). Meanwhile, chemical components in *P. notoginseng* at different developmental stages were also compared; differences are found between two- and three-year-old *P. notoginseng* and principal component 1 identified all parts between two- and three-year-old *P. notoginseng* (Fig. S2).

**Table S1** Calibration curves, linearity, precision, repeatability, stability and recovery rate of seven saponins.

| Saponins | Calibration curves | $R^2$  | Linearity (ug) | RSD% ( $n=5$ ) |               |           | Recovery rate (%) (RSD%) |
|----------|--------------------|--------|----------------|----------------|---------------|-----------|--------------------------|
|          |                    |        |                | Precision      | Repeatability | Stability |                          |
| NG-R1    | $Y=278.3X+8.81$    | 0.9997 | 0.102-2.04     | 0.1            | 1.55          | 2.08      | 95.84(2.09)              |
| G-Rg1    | $Y=112.83X+21.97$  | 0.9998 | 0.101-10.1     | 0.03           | 0.94          | 2.99      | 98.25(2.87)              |
| G-Re     | $Y=237.94X+20.335$ | 0.9998 | 0.098-1.96     | 0.06           | 2.03          | 2.22      | 102.37(1.41)             |
| G-Rb1    | $Y=298.38X+3.3239$ | 0.9999 | 0.096-1.92     | 0.2            | 0.19          | 2.94      | 100.43(0.56)             |
| G-Rc     | $Y=181.18X+2.2452$ | 0.9991 | 0.099-1.98     | 0.52           | 0.41          | 2.63      | 100.60(1.25)             |
| G-Rb2    | $Y=231.26X+3.6762$ | 0.9999 | 0.094-1.88     | 1.12           | 2.68          | 2.80      | 96.68(2.13)              |
| G-Rd     | $Y=290.72X+1.686$  | 1.0000 | 0.099-1.98     | 0.07           | 0.93          | 1.21      | 100.31(1.22)             |

NG: notoginsenoside; G: ginsenoside

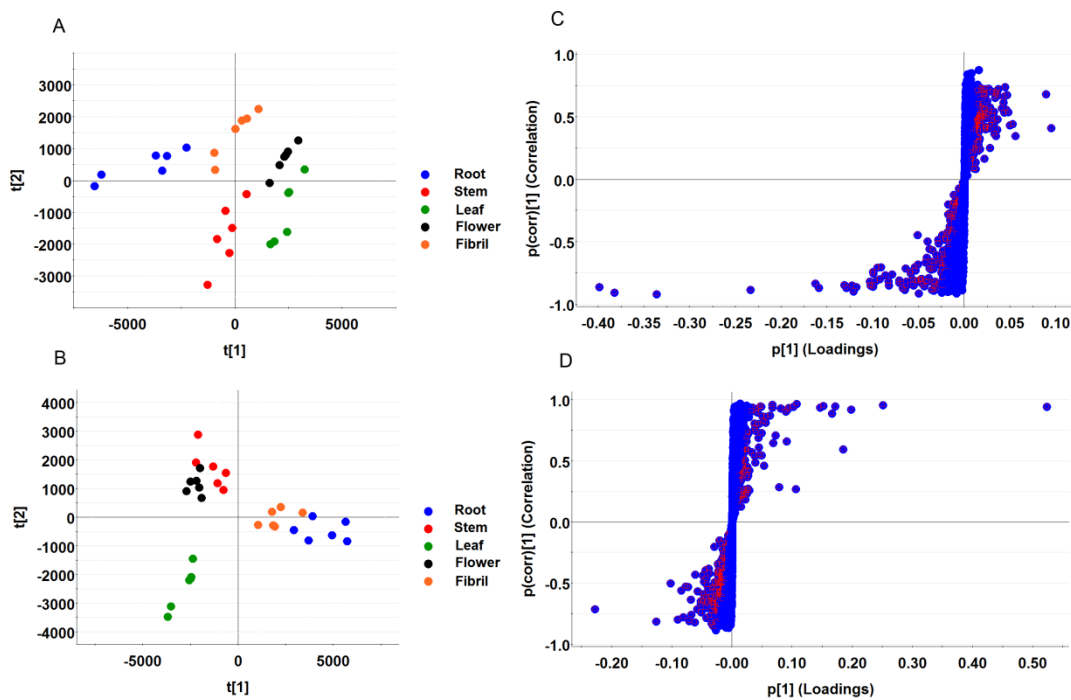

**Figure S1** Metabolic analysis of all components in the five parts during the two- and three-year-old of *P. notoginseng* plants. (A, C) PCA score plots and S-plot of the five parts in two-year-old *P. notoginseng*; (B, D) PCA score plots and S-plot of the five parts in three-year-old *P. notoginseng*.

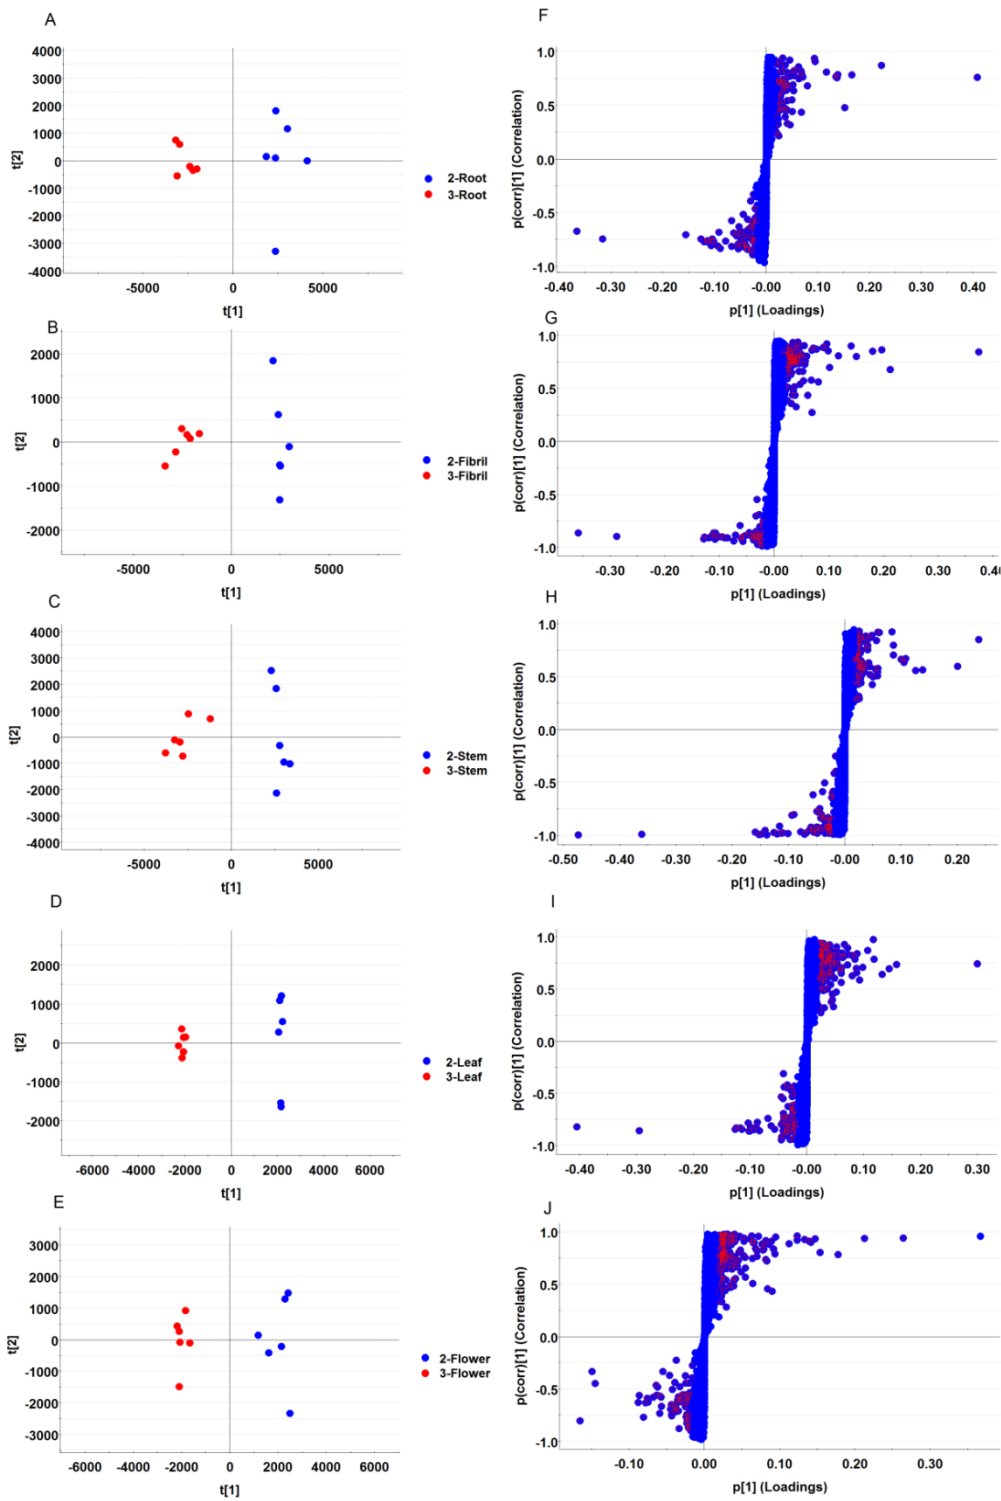

**Figure S2** Metabolic analysis of all components in the same parts of two- and three-year-old of *P. notoginseng* plants. (A, B, C, D, E) PCA score plots of root, fibril, stem, leaf and flower at two developmental stages, respectively; (F, G, H, I, J) S-plot of root, fibril, stem, leaf and flower at three developmental stages, respectively.

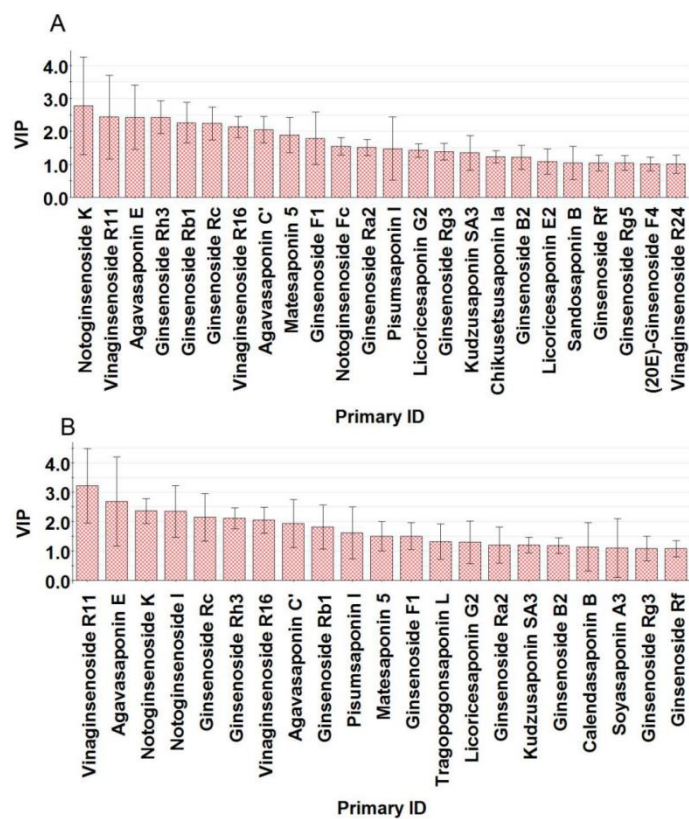

**Figure S3** VIP of saponins in the five parts at the same developmental stages. (A) VIP of root, fibril, stem, leaf and flower in two-year-old *P. notoginseng*. (B) VIP of root, fibril, stem, leaf, and flower in three-year-old *P. notoginseng*.

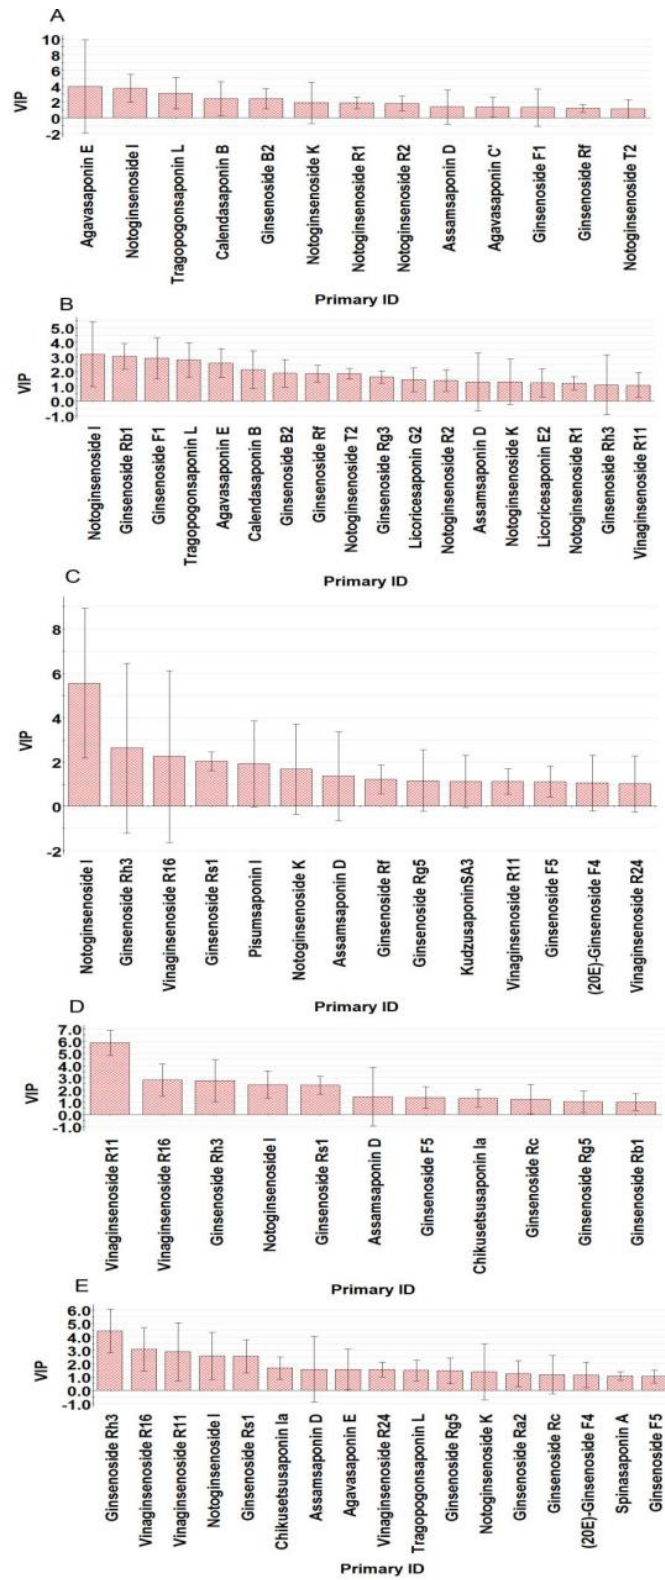

**Figure S4** VIP of saponins in the same parts of two- and three-year-old *P. notoginseng*. (A–E) VIP of roots, fibrils, stems, leaves and flowers in two- and three-year-old *P. notoginseng*.

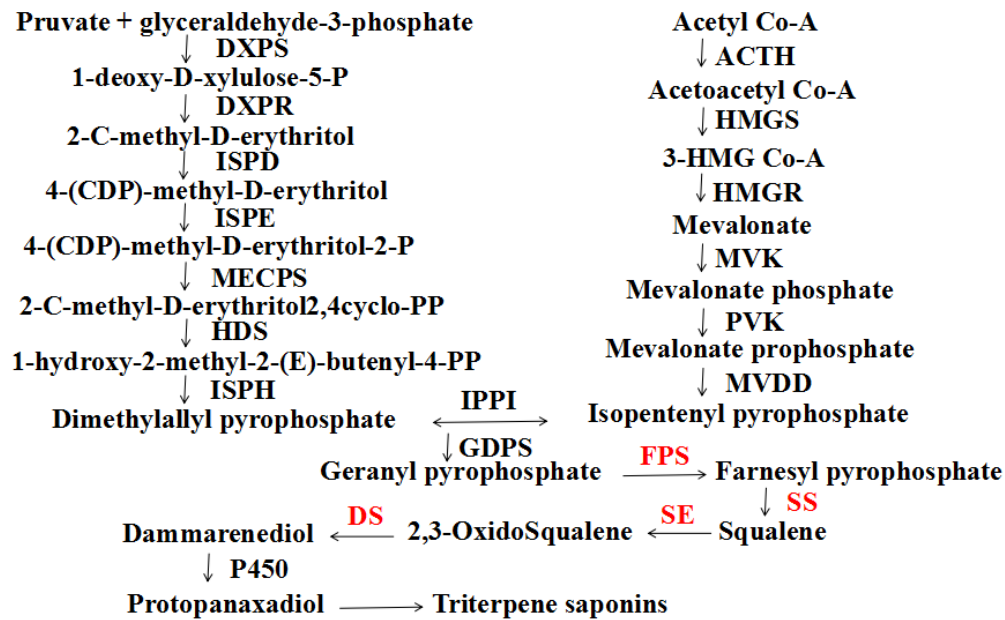

**Figure S5** Biosynthetic pathways of triterpene saponins in *P. notoginseng* plants. MVA pathway: AACT acetoacetyl-CoA acyltransferase; HMGS 3-hydroxy-3-methylglutaryl-CoA synthase; HMGR 3-hydroxy-3-methylglutaryl-CoA reductase; MVK mevalonate kinase; PMK phosphomevalonate kinase; MVDD mevalonate diphosphate decarboxylase; IPPI isopentenyl pyrophosphate isomerase; GDPS geranyl diphosphatesynthase. MEP pathway: DXPS 1-deoxy-o-xylulose 5-phosphate synthase; DXPR 1-deoxy-o-xylulose 5-phosphate reductoisomerase; ISPD 2-C-methylerythritol 4-phosphatecytidyl transferase; ISPE 4-(cytidine-5'-diphospho)-2-C-methylerythritol kinase; MECPS 2-C-methylerythritol-2,4-cyclophosphate synthase; HDS 1-hydroxy-2-methyl-2-(E)-butenyl 4-diphosphate synthase; ISPH 1-hydroxy-2-methyl-2-(E)-butenyl 4-diphosphate reductase; FPS farnesyl pyrophosphate synthase; SS squalene synthase; SE squalene epoxidase; DS dammarenediol-II synthase; P450 P450-monooxygenase.
